# Supplementary material for: Development and application of a framework to estimate health care costs in China: The cervical cancer example
Source: PubMed Central journal article supplement (PMC6773209; doi:10.1371/journal.pone.0222760), 2019-10-01
Supplement: pone.0222760.s003.pdf [file pone.0222760.s003.pdf]

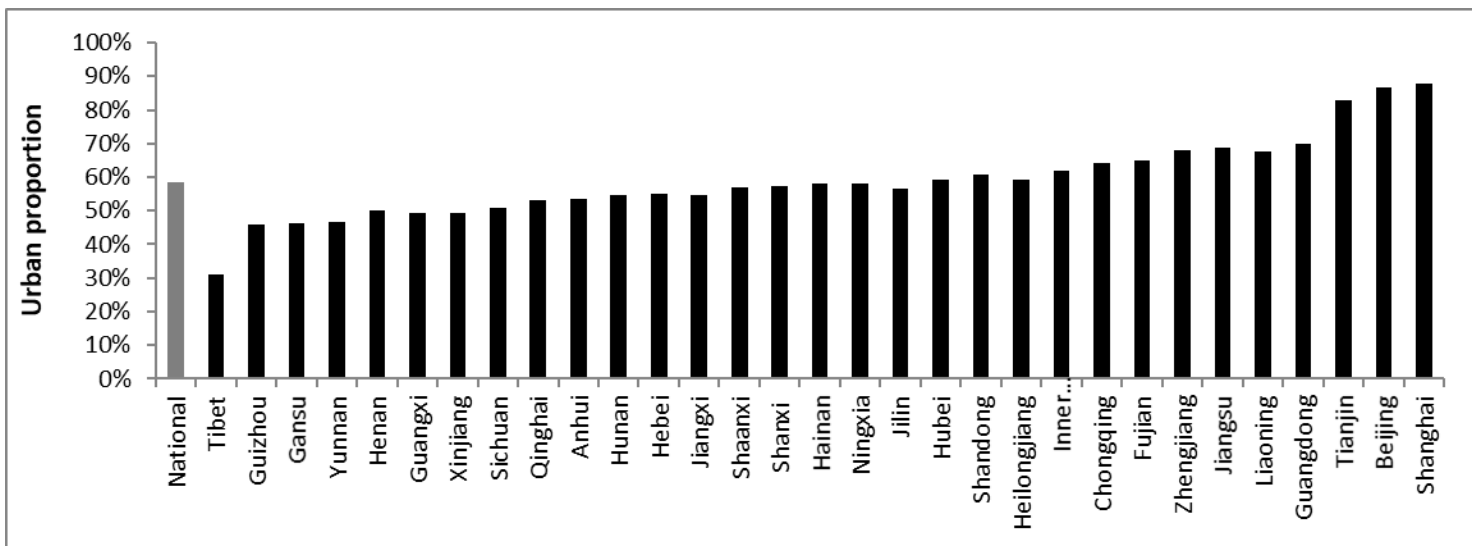

**S3 Fig. The urban percentage of the total population by province**
