# Supplementary material for: Development and application of a framework to estimate health care costs in China: The cervical cancer example
Source: PubMed Central journal article supplement (PMC6773209; doi:10.1371/journal.pone.0222760), 2019-10-01
Supplement: pone.0222760.s004.pdf [file pone.0222760.s004.pdf]

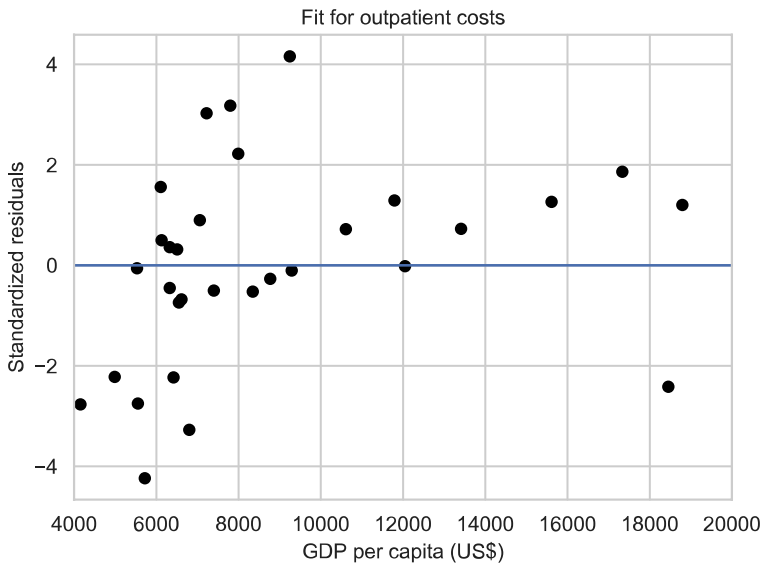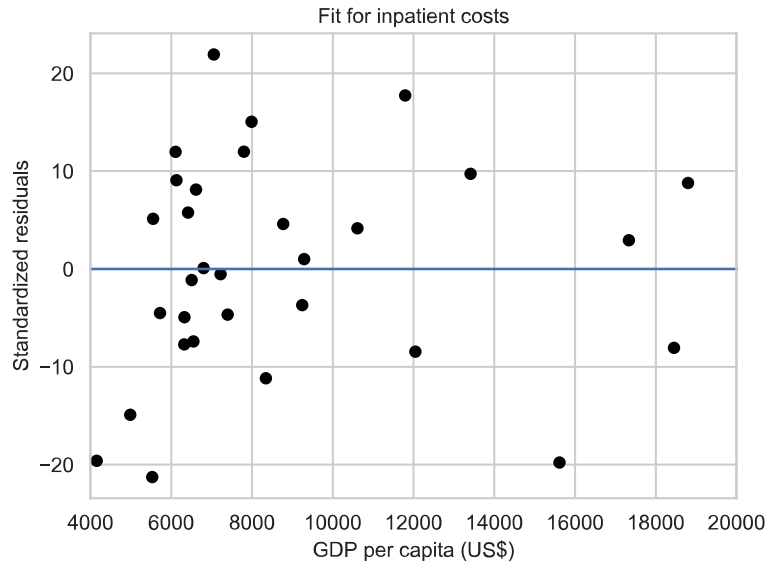

**S4 Fig. Residual plots of outpatient and inpatient costs for the GDP-based exponential fit**
